# Supplementary material
Source: PubMed Central journal article supplement (PMC33457)
Supplement: pnas_081088498_1.pdf [file pnas_081088498_1.pdf]

**Table 2. Effects of *bimD6* on spontaneous intragenic recombination in diploids of *Aspergillus*, i.e., interchromosomal mitotic recombination between homologous sequences**

| Diploid            | Homozyg. mutant       | Nr of Exp. | Spontaneous intragenic ad <sup>+</sup> recombinants |                                |                        | Effects on mitosis   |                       |
|--------------------|-----------------------|------------|-----------------------------------------------------|--------------------------------|------------------------|----------------------|-----------------------|
|                    |                       |            | Frequencies (± SE), x 10 <sup>-6</sup>              |                                |                        | Survival conidia (%) | Abnormal colonies (%) |
|                    |                       |            | 10 <sup>5</sup> /plate                              | 10 <sup>6</sup> /plate         | 10 <sup>7</sup> /plate |                      |                       |
| 2752*              | <b>Control(+)</b>     | 2          | 10.9 ± 1.7                                          | 4.5 ± 0.45                     | -                      | 100                  | 0.8                   |
| 2752b*             | <b>Control(+)</b>     | 4          | 11.7 ± 1.6                                          | 3.4 ± 0.37                     | -                      | 100                  | 0.7                   |
| Total and averages |                       | 6          | <b>11.5±1.4</b>                                     | 4.1 ± 0.33                     | -                      |                      |                       |
| 3223*              | <b><i>bimD6</i></b>   | 4          | 1.2 ± 0.65                                          | -                              | 1.5 ± 0.3 <sup>†</sup> |                      |                       |
|                    |                       | 4          | 1.1 ± 0.15                                          | -                              | 1.2 ± 0.2              |                      |                       |
| Total and averages |                       | 8          |                                                     | <b>1.24 ± 0.2<sup>†</sup></b>  |                        | 43 ± 10              | Temperature dependent |
| 2749*              | <b><i>uvsC114</i></b> | 2          | 1.6 ± 1.0                                           | 0.9 ± 0.3 <sup>†</sup>         | -                      |                      |                       |
|                    |                       | 6          | -                                                   | 1.2 ± 0.4                      | -                      |                      |                       |
| Total and averages |                       | 8          |                                                     | <b>1.30 ± 0.35<sup>†</sup></b> |                        | 72 ± 6 <sup>‡</sup>  | 4.7 <sup>‡</sup>      |

\*Genotypes of tester diploids were of the type shown here for *bimD6* (diploid 3223; (2752b = 3200); control and *uvsC* diploids are as described (15)):

+ + *pabaA6* *yA2* [+ *adE8*] + + + *bimD6* + + + *riboB2* *chaA1*

---

*SulA1* *anA1* + + [*adE20* +] *biA1* *wA2* *cnxE16* *sC12* *bimD6* *pyroA4* *sbA3* *fwA2* + +

† In contrast, *bimD* and *uvsC* mutants never produced many *ad*<sup>+</sup> recombinants, even in platings of 10<sup>7</sup> per plate, and results from low vs. high density were not significantly different. Therefore, the low-density control values are the appropriate ones for comparison with results for these *rec*<sup>-</sup> mutants.

‡ *uvsC* diploids show variable frequencies of haploid segregants, as found for *bimD6* at higher temperature.
