# Supplementary material
Source: PubMed Central journal article supplement (PMC33457)
Supplement: pnas_081088498_4.pdf [file pnas_081088498_4.pdf]

**Table 3. Benomyl sensitivity of *bimD6*: conidial survival and growth inhibition of haploid *bimD6* and *uvsC114* strains vs. control on inhibiting concentrations of benomyl at permissive temperature**

| Benomyl<br>( $\mu\text{g/ml}$ in<br>CM) | Control* (Repair-proficient) |      |               |     | <i>bimD6</i> * (Rec <sup>-</sup> ) |     |               |     | <i>uvsC114</i> * (Rec <sup>-</sup> ) |      |                |     |
|-----------------------------------------|------------------------------|------|---------------|-----|------------------------------------|-----|---------------|-----|--------------------------------------|------|----------------|-----|
|                                         | Colonies                     |      |               |     | Colonies                           |     |               |     | Colonies                             |      |                |     |
|                                         | Number <sup>†</sup>          | %    | Size          | %   | Number <sup>†</sup>                | %   | Size          | %   | Number <sup>†</sup>                  | %    | Size           | %   |
| 0                                       | 180                          | 100  | 7.6 $\pm$ 0.3 | 100 | 127                                | 100 | 8.1 $\pm$ 0.6 | 100 | ~200                                 | 100  | 7.9 $\pm$ 0.3  | 100 |
| 0.36                                    | >178                         | ~100 | 5.2 $\pm$ 0.2 | 68  | 109 $\pm$ 2.1                      | 86  | 6.4 $\pm$ 0.  | 75  | 204                                  | ~100 | 6.9 $\pm$ 0.2  | 88  |
| 0.48                                    | 221                          | ~100 | 3.1 $\pm$ 0.1 | 40  | 17.5 $\pm$ 1.0                     | 14  | 2.5 $\pm$ 1.2 | 31  | 216                                  | ~100 | 3.8 $\pm$ 0.2  | 48  |
|                                         |                              |      |               |     | [&16.5 $\pm$ 3.1                   |     |               |     |                                      |      |                |     |
|                                         |                              |      |               |     | very small]                        |     |               |     |                                      |      |                |     |
| 0.60                                    | 210                          | ~100 | 2.3 $\pm$ 0.1 | 30  | 4.25 $\pm$ 1.9                     | 3.3 | 1.4 $\pm$ 0.2 | 17  | 131                                  | 65   | 3.1 $\pm$ 0.2  | 39  |
|                                         |                              |      |               |     | [& a few                           |     |               |     |                                      |      |                |     |
|                                         |                              |      |               |     | very small]                        |     |               |     |                                      |      |                |     |
| 0.72                                    | 153 $\pm$ 14                 | 85   | 1.4 $\pm$ 0.2 | 18  | 0.35 $\pm$ 0.2                     | 0.3 | <1 [not       | 0   | 60                                   | 30   | 2.1 $\pm$ 0.15 | 27  |
|                                         |                              |      |               |     |                                    |     | measurable]   |     |                                      |      |                |     |

\* Congenic strains used (at least half of the chromosomes being identical):

| FGSC#        | M/EK No. | Genotypes                                    | Origin: cross / 2n        |
|--------------|----------|----------------------------------------------|---------------------------|
| <b>A 830</b> | 2892     | <i>pabaA1; AcrA1; ActA1; choA1; riboB2</i>   | <i>chaA1</i> (2600b.1.15) |
| <b>A1063</b> | 4092     | <i>pabaA1; <u>bimD6</u> pyroA4; choA1; +</i> | <i>chaA1</i> (3214.1.11)  |
| <b>A 833</b> | 3571     | <i>pabaA1; + + choA1; <u>uvsC114</u></i>     | <i>chaA1</i> (2606.2.3)   |

<sup>†</sup> Colony counts of 3 plates, more if “Average  $\pm$  SE” shown.
